# Supplementary material for: miR-1323 suppresses bone mesenchymal stromal cell osteogenesis and fracture healing via inhibiting BMP4/SMAD4 signaling
Source: J Orthop Surg Res. 2020 Jun 29;15:237. doi: 10.1186/s13018-020-01685-8 (PMC7322887; doi:10.1186/s13018-020-01685-8)
Supplement: Supplementary file 1 — Additional file 1: Table S1. Sequences of oligonucleotides used in this study. [file 13018_2020_1685_MOESM1_ESM.xlsx]

## Sheet: Sheet1
	Additional Table 1. Sequences of oligonucleotides used in this study.
	Oligo name	Sequence (5’ to 3’)
	miR-1323 mimics	UCAAAACUGAGGGGCAUUUUCU
	miR-1323 inhibitor	AGAAAAUGCCCCUCAGUUUUGA
	Negative control (NC) mimics	UUCUCCGAACGUGUCACGUTT
	Negative control (NC) inhibitor	CAGUACUUUUGUGUAGUACAA
	AntagomiR-1323	AGAAAAUGCCCCUCAGUUUUGA*
	Negative control AntagomiR (AntagomiR-NC)	AAGGCAAGCUGACCCUGAAGUU*
	*For improved in vivo delivery, the 3’end was cholesterol-conjugated and all bases 2’OMe-modified.
