# Supplementary material for: miR-1323 suppresses bone mesenchymal stromal cell osteogenesis and fracture healing via inhibiting BMP4/SMAD4 signaling
Source: J Orthop Surg Res. 2020 Jun 29;15:237. doi: 10.1186/s13018-020-01685-8 (PMC7322887; doi:10.1186/s13018-020-01685-8)
Supplement: Supplementary file 2 — Additional file 2: Table S2. Primers used in qRT-PCR experiments. [file 13018_2020_1685_MOESM2_ESM.xlsx]

## Sheet: Sheet1
	Additional Table 2. Primers used in qRT-PCR experiments.
	Gene name	Forward primer (5’ to 3’)
	miR-1323	TCAAAACTGAGGGGCATTTTC
	RUNX2	CCTAAATCACTGAGGCGGTC
	ALP	GGGATAAAGCAGGTCTTGGGGTGC
	COL1A1 (Collagen I)	TCTGCGACAACGGCAAGGTG
	RNU6B (miRNA control)	TTCCTCCGCAAGGATGACACGC
	GAPDH (mRNA control)	GTCTCCTCTGACTTCAACAGCG
