# Supplementary material for: miR-1323 suppresses bone mesenchymal stromal cell osteogenesis and fracture healing via inhibiting BMP4/SMAD4 signaling
Source: J Orthop Surg Res. 2020 Jun 29;15:237. doi: 10.1186/s13018-020-01685-8 (PMC7322887; doi:10.1186/s13018-020-01685-8)
Supplement: Supplementary file 3 — Additional file 3: Table S3. Clinicodemographic characteristics of tibial fracture enrollees (n = 10). [file 13018_2020_1685_MOESM3_ESM.xlsx]

## Sheet: Sheet1
	Additional Table 3. Clinicodemographic characteristics of tibial fracture enrollees (n=10).
	Parameter	SHF (n=5)			ANU (n=5)			P-values
	Age [median (range)]	31.6	(22.8,	75.8)	43	(18.3,	76.2)	0.82
	Sex (% male)	1			1			1
	BMI [median (range)]	24.7	(19.0,	28.8)	25.1	(17.6,	35.0)	0.68
	Daily smoking	0.2			0.6			0.2
	Daily alcohol consumption (non-heavy)	0			0.2			<0.01*
	Arthritic/rheumatic disease	0			0			1
	Diabetes	0			0			1
	Chronic pulmonary disease	0			0			1
	Cardiovascular disease	0			0			1
	Hypertension (untreated)	0			0.2			<0.01*
	Hyperlipidemia (untreated)	0			0.2			<0.01*
	Liver disease	0			0			1
	Thyroid disease	0			0			1
	Vitamin D disorder	0			0			1
	CRP (mg/l) [median (range)]	0.56	(0.47,	0.74)	0.66	(0.52,	0.72)	0.5
	*P<0.05, statistically significant
